# Supplementary material for: Classical molecular dynamics and metadynamics simulations decipher the mechanism of CBP30 selectively inhibiting CBP/p300 bromodomains
Source: Royal Society of Chemistry journal article supplement (doi:10.1039/c8ob01526k), 2018-01-01
Supplement: c8ob01526k1.pdf [file c8ob01526k1.pdf]

**Classical molecular dynamics and metadynamics  
simulations decipher the mechanism of CBP30 selectively  
inhibiting CBP/p300 bromodomains**

**Qianqian Wang<sup>1</sup>, Xiaoli An<sup>2</sup>, Jiahui Xu<sup>1</sup>, Yuwei Wang<sup>1</sup>, Liang Liu<sup>1\*</sup>, Elaine Lai-**

**Han Leung<sup>1\*</sup> and Xiaojun Yao<sup>1,2\*</sup>**

<sup>1</sup>State Key Laboratory of Quality Research in Chinese Medicine/Macau Institute for  
Applied Research in Medicine and Health, Macau University of Science and  
Technology, Taipa, Macau, China

<sup>2</sup>State Key Laboratory of Applied Organic Chemistry and Department of Chemistry,  
Lanzhou University, Lanzhou, China

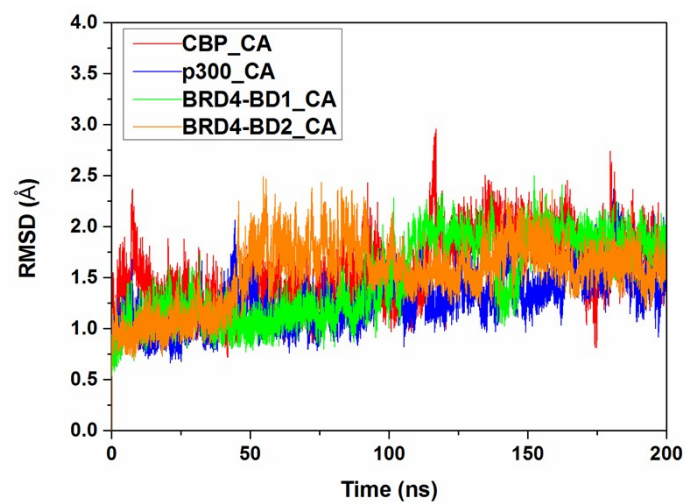

**Fig. S1.** Root mean square deviations (RMSD) of protein C $\alpha$  atoms for four systems as a function of time in MD simulations.

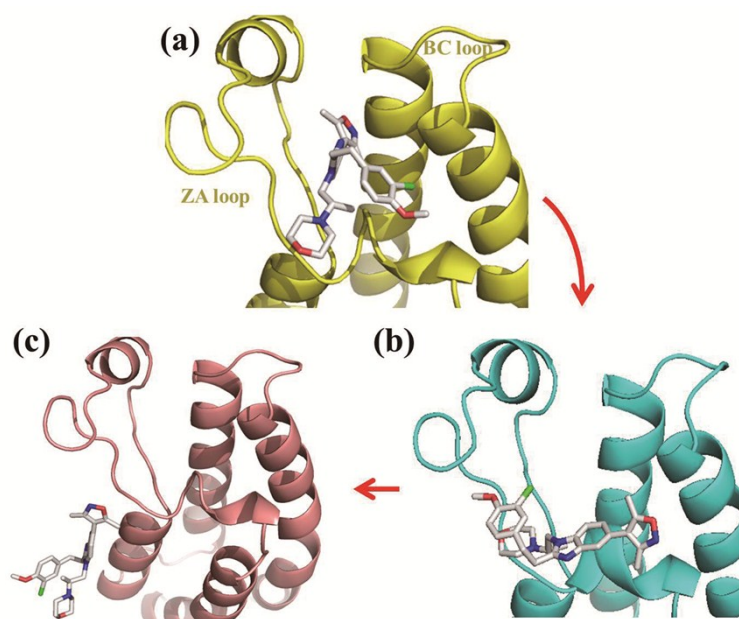

**Fig. S2.** Representative structures of (a) binding state ("B"), (b) transition state ("T"), and (c) unbinding state ("U") of p300-CBP30 complex during the unbinding process.

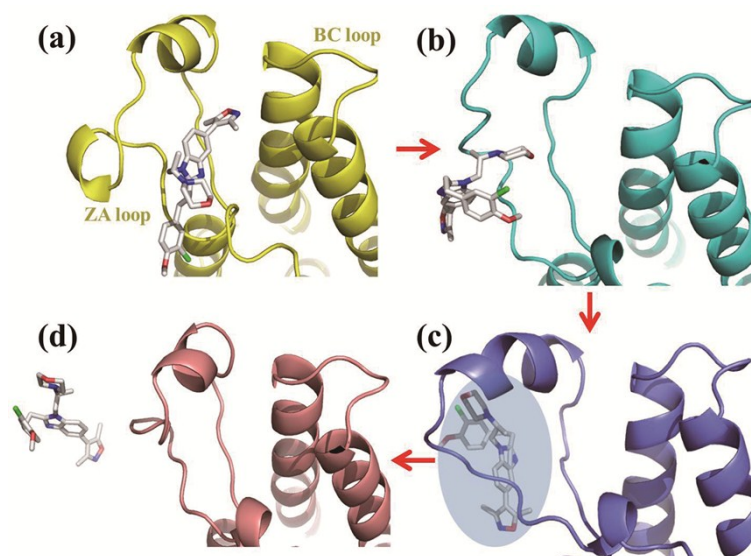

**Fig. S3.** Representative structures of (a) binding state (“B”), (b) transition state (“T”), (c) temporary intermediate state (“I”), and (d) unbinding state (“U”) of BRD4-BD2-CBP30 complex during the unbinding process.
